# Supplementary material for: Isolation, molecular typing and antimicrobial resistance of Clostridium difficile in dogs and cats in Lanzhou city of Northwest China
Source: Front Vet Sci. 2022 Nov 18;9:1032945. doi: 10.3389/fvets.2022.1032945 (PMC9716199; doi:10.3389/fvets.2022.1032945)
Supplement: Supplementary file 1 [file Table_1.XLSX]

## Sheet: 管家基因
序号	adk	atpA	dxr	glyA	recA	sodA	tpi	MLST	Hospital	Source	Ribotype	ERY	CIP	MTZ	CLI	MEN	MXF	VAN	LVX	tcdA	tcdB	cdtA	cdtB	tcdC
1	1	1	1	10	1	3	5	ST1	A	Dog	RT027	128	16	4	32	2	4	0.5	16	Y	Y	Y	Y	Y
5	1	1	7	1	1	3	3	ST133	A	Cat	LW04	64	128	4	8	16	2	0.5	2	Y	Y	N	N	N
35	1	1	6	1	8	5	1	ST15	A	Dog	LW03	128	128	4	2	8	2	0.5	2	N	N	N	N	N
2	1	1	2	1	5	3	1	ST2	A	Dog	LW01	128	128	4	4	8	2	0.5	2	Y	Y	N	N	N
3	1	1	2	1	5	3	1	ST2	A	Cat	RT014	128	128	4	32	8	2	0.5	2	Y	Y	N	N	N
4	1	1	2	1	5	3	1	ST2	A	Cat	RT014	128	128	4	4	8	2	0.5	2	Y	Y	N	N	N
32	1	1	6	1	4	3	4	ST26	B	Dog	LW02	128	16	4	32	8	2	0.5	1	N	N	N	N	N
33	1	1	2	1	1	1	1	ST3	A	Dog	RT001	128	128	4	2	8	4	0.5	2	Y	Y	N	N	N
6	7	3	10	8	7	2	10	ST39	A	Dog	LW06	128	128	4	32	8	16	0.5	32	N	N	N	N	N
36	7	3	10	8	7	2	10	ST39	A	Dog	LW06	128	128	4	2	4	8	0.5	1	N	N	N	N	N
37	7	3	10	8	7	2	10	ST39	A	Dog	LW06	128	128	4	32	8	8	0.5	64	N	N	N	N	N
40	7	3	10	8	7	2	10	ST39	A	Dog	LW06	128	64	4	256	2	8	0.5	1	N	N	N	N	N
7	1	1	2	1	1	7	1	ST42	A	Dog	RT106	128	128	4	32	8	1	0.5	2	Y	Y	N	N	N
8	1	1	2	1	1	7	1	ST42	A	Dog	RT106	128	128	4	2	8	2	0.5	2	Y	Y	N	N	N
17	1	1	2	1	1	7	1	ST42	A	Dog	RT106	128	64	4	2	8	2	0.5	1	Y	Y	N	N	N
19	1	1	2	1	1	7	1	ST42	A	Dog	RT106	128	128	4	2	8	2	0.5	1	Y	Y	N	N	N
22	1	1	2	1	1	7	1	ST42	A	Dog	RT106	128	128	4	32	8	16	0.5	2	Y	Y	N	N	N
26	1	1	2	1	1	7	1	ST42	B	Dog	RT106	128	128	4	2	8	2	0.5	2	Y	Y	N	N	N
27	1	1	2	1	1	7	1	ST42	D	Dog	RT106	128	64	4	32	8	2	0.5	2	Y	Y	N	N	N
29	1	1	2	1	1	7	1	ST42	A	Dog	RT106	128	64	4	32	16	1	0.5	64	N	N	N	N	N
30	1	1	2	1	1	7	1	ST42	A	Cat	RT106	128	128	4	32	8	2	0.5	32	Y	Y	N	N	N
31	1	1	2	1	1	7	1	ST42	A	Cat	RT106	128	128	4	32	8	2	0.5	4	Y	Y	N	N	N
43	1	1	6	1	1	1	1	ST76	E	Dog	LW05	128	64	4	256	8	2	0.5	1	N	N	N	N	N
23	4	1	7	1	1	3	3	ST-UN	A	Dog	LW04	128	128	4	32	8	2	0.5	2	Y	Y	N	N	N
